# Supplementary material for: The “one size fits all” approach to trauma treatment: should we be satisfied?
Source: PubMed Central journal article supplement (PMC4439409; doi:10.3402/ejpt.v6.27344), 2015-05-19
Supplement: EJPT-6-27344-s003.pdf [file EJPT-6-27344-s003.pdf]

## **A „mind egy kaptafára” megközelítés a trauma terápiában: Meg vagyunk elégedve?**

Marylene Cloitre

Jelentős előrelépés volt a poszttraumás stressz zavar (PTSD) kezelésében az elmúlt két évtizedben. További előrelépés várható, ha a különböző populációk tüneti sokszínűségét felismerjük és személyre szabott intervencióval tudunk szolgálni. A beteggel való együttműködés a terápiás preferenciáinak kialakításában (struktúra, folyamat) nagyon fontos a hatékony, minőségi és gyorsan disszeminálható intervenció kialakításában. Új kutatási módszerek szükségesek a beteg preferencia és tüneti heterogenitás figyelembevételére, anélkül hogy szükségtelenül meghosszabbítanánk a kutatások hosszát vagy bonyolítanánk a kutatási elrendezést. Egy lehetséges példa kerül bemutatásra.

**Kulcsszavak:** PTSD; komplex PTSD, beteg preferencia

**Citation:** European Journal of Psychotraumatology 2015, 6: 27344 - <http://dx.doi.org/10.3402/ejpt.v6.27344>
